# Supplementary material for: Paraskeletal and extramedullary plasmacytomas in multiple myeloma at diagnosis and at first relapse: 50-years of experience from an academic institution
Source: PubMed Central journal article supplement (PMC9481598; doi:10.1038/s41408-022-00730-5), 2022-09-16

**Supplementary table 1: Baseline characteristics of the patients with PPs and EMPs**

|                                               | <b>PPs<br/>N= 230</b> | <b>EMPs<br/>N=26</b>     | <b>P value</b> |
|-----------------------------------------------|-----------------------|--------------------------|----------------|
| <b>Gender (male), n (%)</b>                   | 133 (57.8%)           | 15 (57.6%)               |                |
| <b>Age (years), median( range)</b>            |                       |                          |                |
| <b>ISS , n(%)*</b>                            |                       |                          |                |
| • I                                           | 84 (50%)              | 8 (47%)                  | NS             |
| • II                                          | 47 (27.9%)            | 3 (17.6%)                | NS             |
| • III                                         | 37 (22%)              | 6 (35% <sup>9</sup> )    | NS             |
| <b>Heavy chain type, n( %)</b>                |                       |                          |                |
| • IgG                                         | 110 (47.8%)           | 14 (53.8%)               | NS             |
| • IgA                                         | 58 (25.2%)            | 7 (26.9%)                | NS             |
| • Ligh chain                                  | 47 (20.4%)            | 3 (11.5%)                | NS             |
| • IgD                                         | 4 (1.7%)              | -                        | NS             |
| • IgM                                         | 2 (0.8%)              | -                        |                |
| • Non- secretory                              | 7 (3%)                | 1 (3.8%)                 | NS             |
| • Biclonal                                    | 2 (0.8%)              | -                        |                |
| • Unknown                                     |                       | 1 (3.8%)                 |                |
| <b>Ligh chain type, n (%)</b>                 |                       |                          |                |
| • Kappa                                       | 129 (56%)             | 11 (42.3% <sup>9</sup> ) | NS             |
| • Lambda                                      | 91 (39.5%)            | 12 (46.1%)               | NS             |
| • Non-secretory                               | 7 (3%)                | 1 (3.8%)                 | NS             |
| • Biclonal                                    | 2 (0.08%)             | -                        |                |
| • Unknown                                     | 1 (0.04%)             | 2 (7.6%)                 |                |
| <b>Serum M-protein s (g/L)(mean±SD)</b>       | 24.05±21.3            | 29.07±18.2               | NS             |
| <b>Bone marrow plasma cells (%) (mean±SD)</b> | 31±28                 | 31±35                    | NS             |

\*Available in 185 patients

**Supplementary table S2: Initial therapy in the overall series according to the presence or absence of Ps**

|                | <b>Patients without Ps<br/>N=1048</b> | <b>Patients with Ps<br/>N=256</b> | <b>P value</b> |
|----------------|---------------------------------------|-----------------------------------|----------------|
| <b>QT</b>      | 728 (69.4%)                           | 145 (56.6%)                       | <0.001         |
| <b>PI</b>      | 134 (12.7%)                           | 46 (17.9%)                        | 0.03           |
| <b>IMiD</b>    | 55 (5.2%)                             | 15 (5.8%)                         | NS             |
| <b>PI+IMiD</b> | 106 (10.1%)                           | 44 (17.1%)                        | 0.001          |
| <b>MAB</b>     | 13 (1.2%)                             | 3 (1.1%)                          | NS             |

**Supplementary table 3: detailed therapy at initial diagnosis in the overall series according to the presence or absence of Ps**

|                                       | <b>Patients without Ps<br/>N=1048</b> | <b>Patients with Ps<br/>N=256</b> | <b>P value</b> |
|---------------------------------------|---------------------------------------|-----------------------------------|----------------|
| <b>QT</b>                             | 728 (69.4%)                           | 145 (56.6%)                       | <0.001         |
| • Melphalan/prednisone                | 285 (27.1%)                           | 45 (17.5%)                        |                |
| • Cyclophosphamide/dexa or prednisone | 120 (11.4%)                           | 19 (7.4%)                         |                |
| • VCMP/VBAP                           | 106 (10.1%)                           | 22 (8.5%)                         |                |
| • VBMCP/VBAD                          | 103 (9.8%)                            | 28 (10.9%)                        |                |
| • VAD                                 | 26 (2.4%)                             | 7 (2.7%)                          |                |
| • Others                              | 88 (8.3%)                             | 24 (9.3%)                         |                |
| <b>PI</b>                             | 134 (12.7%)                           | 46 (17.9%)                        | 0.03           |
| • Bortezomib/dexamethasone            | 67 (6.3%)                             | 19 (7.4%)                         |                |
| • MPV                                 | 36 (3.4%)                             | 19 (7.4%)                         |                |
| • Others                              | 31 (2.9%)                             | 8 (3.1%)                          |                |
| <b>IMiD</b>                           | 55 (5.2%)                             | 15 (5.8%)                         | NS             |
| • Thal/dex                            | 20 (1.9%)                             | 10 (3.9%)                         |                |
| • Len/dex                             | 16 (1.5%)                             | 5 (1.9%)                          |                |
| • LEn/dex/clarithromycin              | 12 (1.1%)                             | -                                 |                |
| • Others                              | 5 (0.4%)                              |                                   |                |
| <b>PI+IMiD</b>                        | 106 (10.1%)                           | 44 (17.1%)                        | 0.001          |
| • VTD                                 | 71 (6.7%)                             | 30 (11.7%)                        |                |
| • VRD                                 | 18 (1.7%)                             | 8 (3.1%)                          |                |
| • MPV/Rd                              | 10 (0.9%)                             | 3 (1.1%)                          |                |
| • Others                              | 7 (0.6%)                              | 3 (1.1%)                          |                |
| <b>MAb</b>                            | 13 (1.2%)                             | 3 (1.1%)                          | NS             |
| • MPV-daratumumab                     | 7 (0.6%)                              | 2 (0.7%)                          |                |
| • Lena/dexa/elotuzumab                | 5 (0.4%)                              | 1 (0.3%)                          |                |

**Supplementary table 4: detailed therapy at first relapse in the overall series according to the presence or absence of Ps**

|                                              | <b>Patients without Ps<br/>N=775</b> | <b>Patients with Ps<br/>N=192</b> | <b>P value</b> |
|----------------------------------------------|--------------------------------------|-----------------------------------|----------------|
| <b>Received salvage therapy</b>              | N= 576                               | N= 178                            |                |
| <b>QT</b>                                    | 298                                  | 88                                | NS             |
| • <b>Melphalan/prednisone</b>                | 66                                   | 9                                 |                |
| • <b>Cyclophosphamide/dexa or prednisone</b> | 87                                   | 22                                |                |
| • <b>VCMP/VBAP</b>                           | 21                                   |                                   |                |
| • <b>VBAD or VBAP</b>                        | 54                                   | 20                                |                |
| • <b>Others</b>                              | 70                                   | 30                                |                |
| <b>PI</b>                                    | 118                                  | 40                                | NS             |
| • <b>Bortezomib/dexamethasone</b>            | 45                                   | 15                                |                |
| • <b>bortezomib</b>                          | 23                                   | 7                                 |                |
| • <b>Carfilzomib/dexamethasone</b>           | 12                                   | 2                                 |                |
| • <b>MPV</b>                                 | 10                                   | 2                                 |                |
| • <b>Others</b>                              | 28                                   | 14                                |                |
| <b>IMiD</b>                                  | 94                                   | 16                                | 0.01           |
| • <b>Len/dex</b>                             | 66                                   | 9                                 |                |
| • <b>Thalidomide</b>                         | 23                                   | 5                                 |                |
| • <b>Others</b>                              | 5                                    | 2                                 |                |
| <b>PI+IMiD</b>                               | 38                                   | 17                                | NS             |
| • <b>KRd</b>                                 | 29                                   | 14                                |                |
| • <b>Others</b>                              | 9                                    | 3                                 |                |
| <b>MAB</b>                                   | 25                                   | -                                 |                |
| • <b>DRd</b>                                 | 10                                   |                                   |                |
| • <b>DVd</b>                                 | 7                                    |                                   |                |
| • <b>DKd</b>                                 | 6                                    |                                   |                |
| • <b>Others</b>                              | 2                                    |                                   |                |

**Supplementary figure 1:** overall survival from diagnosis according to the initial therapy a) conventional chemotherapy, b) PI-based, c) IMiD-based, d) PI+IMiD-based

A

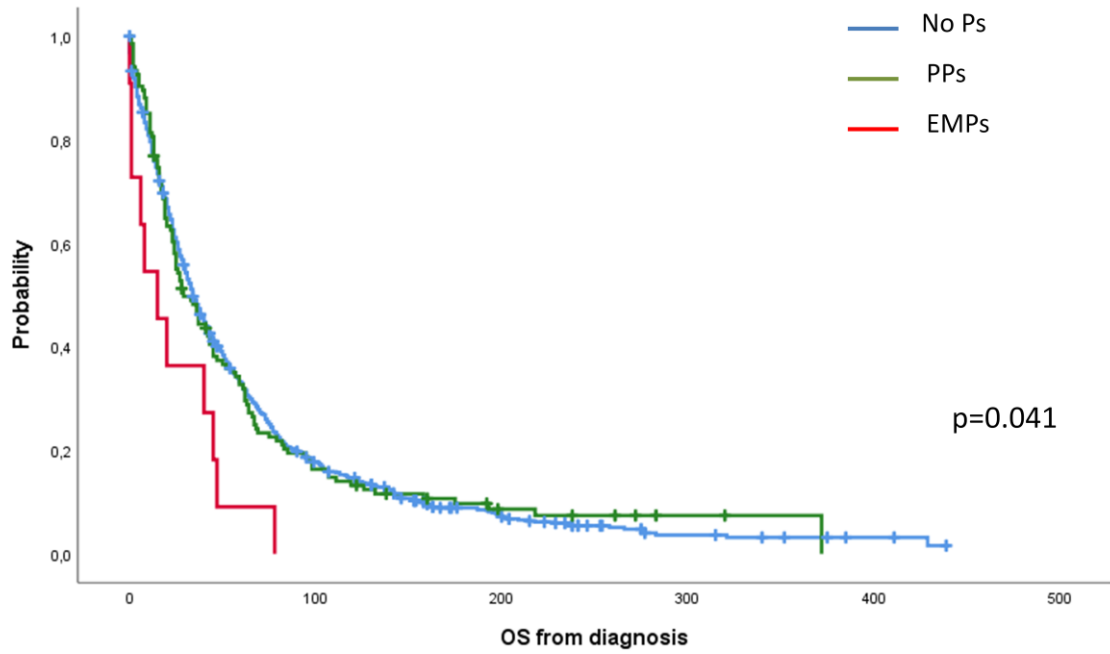

B

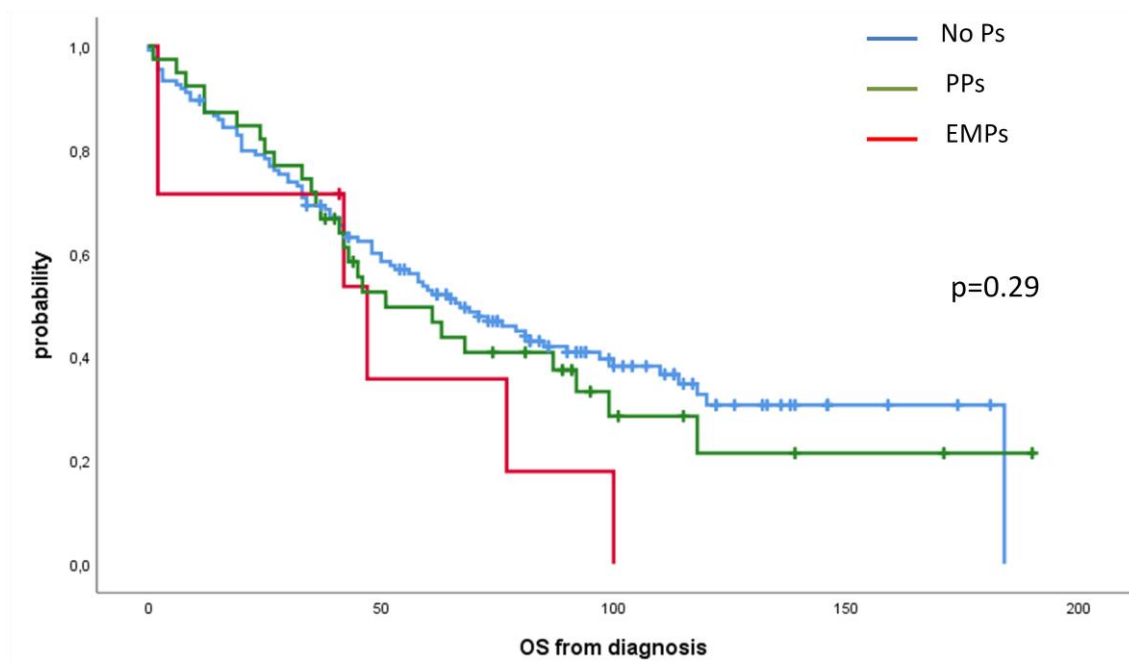

C

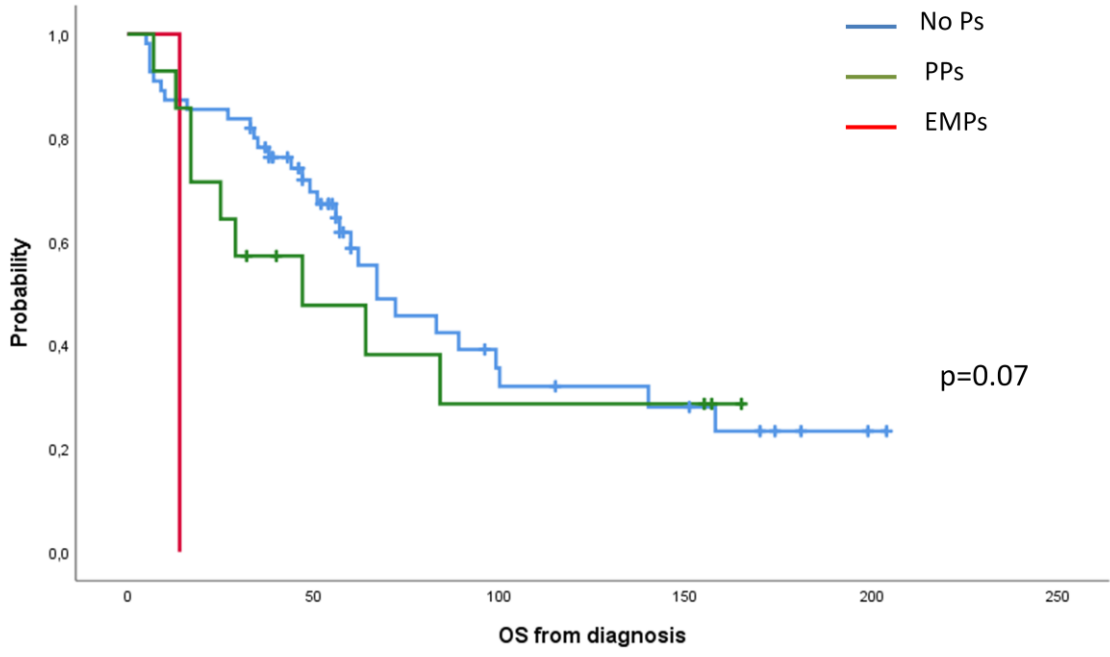

D

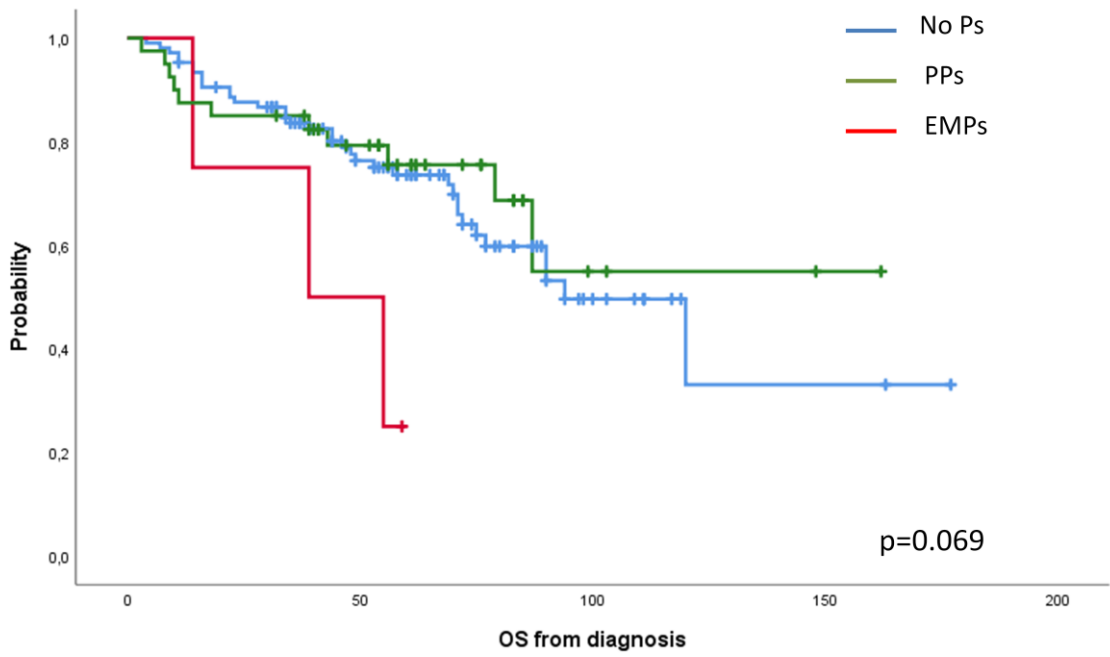

Supplementary figure 2: overall survival from first relapse according to salvage therapy a) conventional chemotherapy, b) PI-based, c) IMiD-based, d) PI+IMiD-based

A

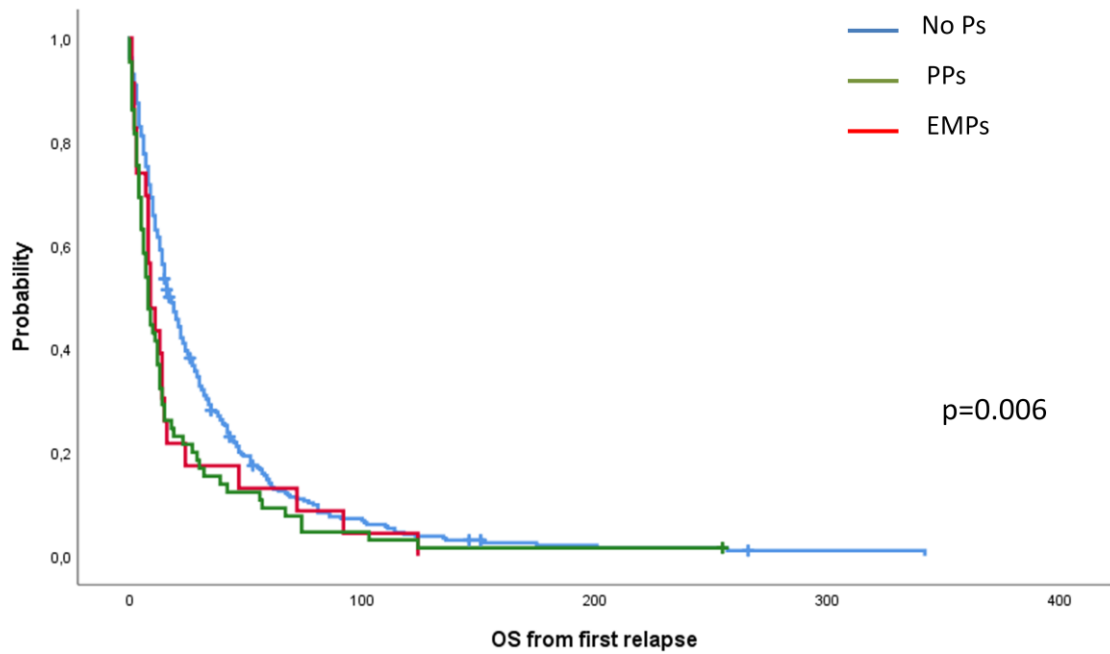

B

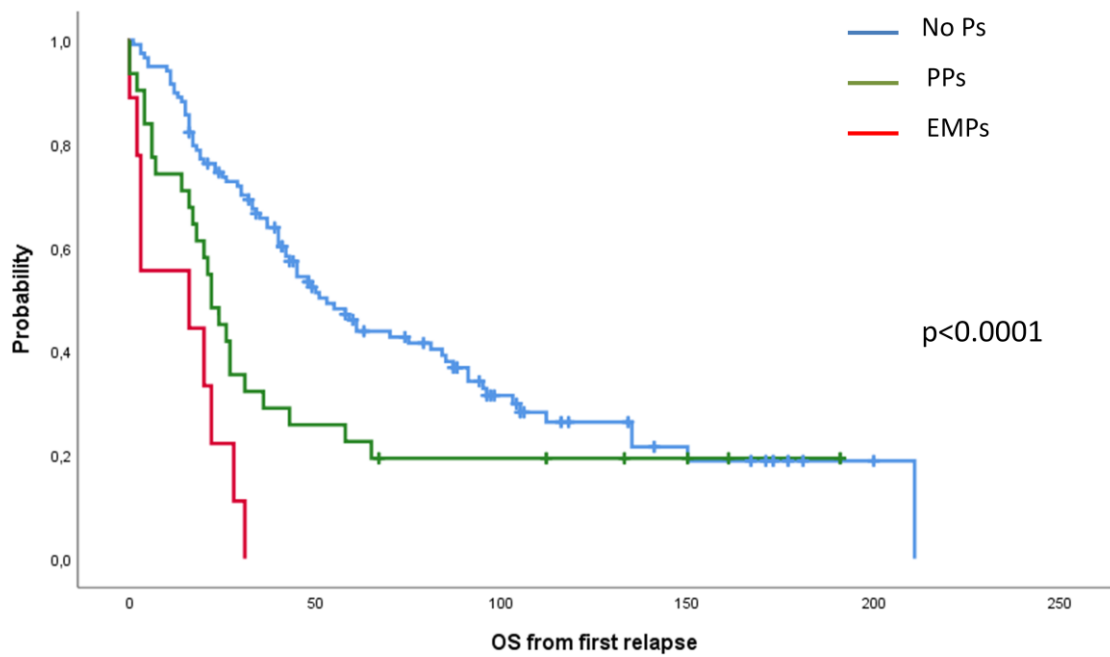

C

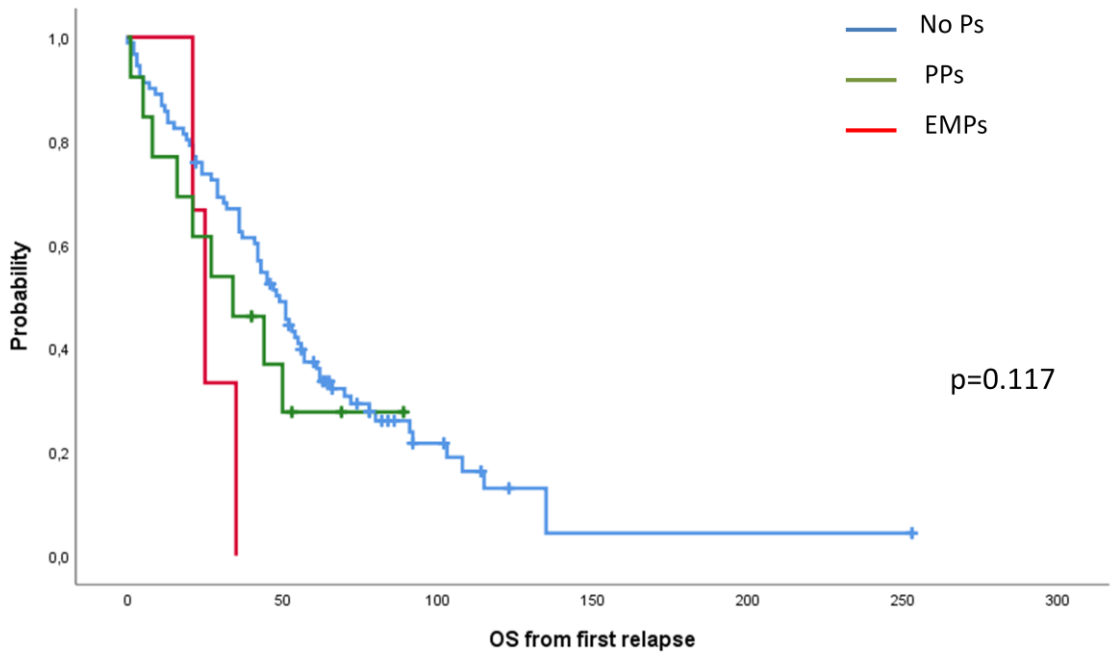

D

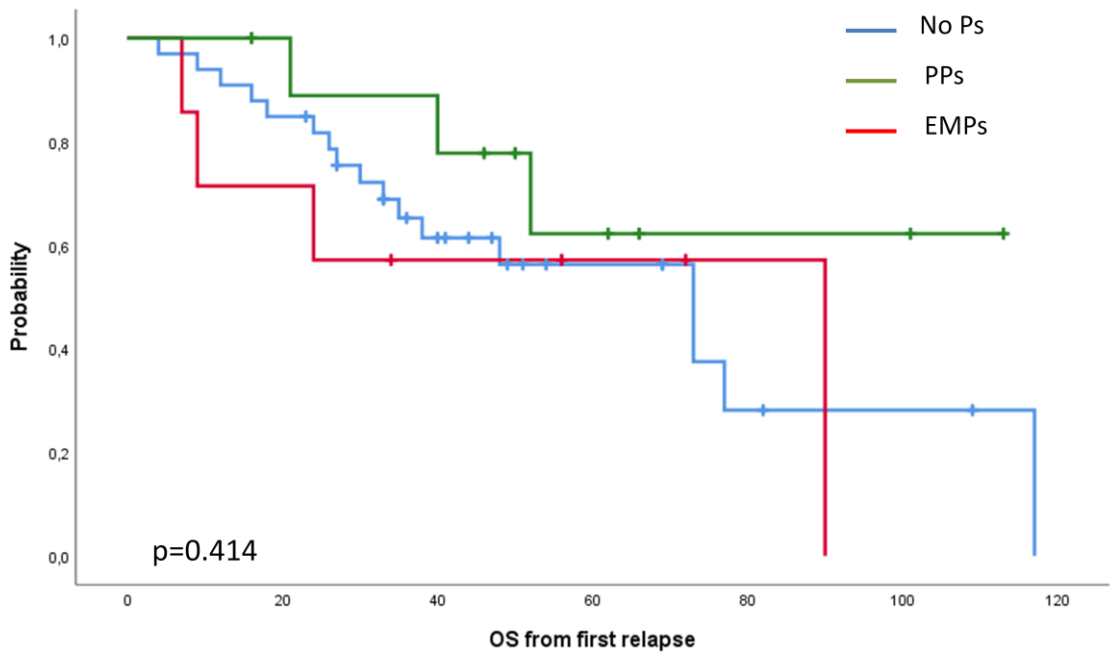

Supplement: 41408_2022_730_MOESM1_ESM.pdf [file 41408_2022_730_MOESM1_ESM.pdf]
